# Supplementary material for: Selective control of fcc and hcp crystal structures in Au–Ru solid-solution alloy nanoparticles
Source: PubMed Central journal article supplement (PMC5802822; doi:10.1038/s41467-018-02933-6), 2018-02-06
Supplement: 41467_2018_2933_MOESM3_ESM.pdf [file 41467_2018_2933_MOESM3_ESM.pdf]

## **Description of Additional Supplementary Files**

File Name: Supplementary Movie 1

Description: 3D reconstruction showing the overall view of the fcc-AuRu NP.

File Name: Supplementary Movie 2

Description: 3D reconstruction showing the layer view of the fcc-AuRu NP.
